# Supplementary material for: Duplicate Gene Divergence by Changes in MicroRNA Binding Sites in Arabidopsis and Brassica
Source: PubMed Central journal article supplement (PMC5322543; doi:10.1093/gbe/evv023), 2015-02-02
Supplement: supp_evv023_Supplemental_figures.pdf [file supp_evv023_Supplemental_figures.pdf]

**A**

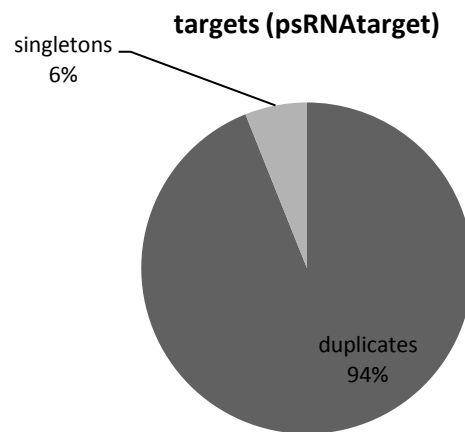

**B**

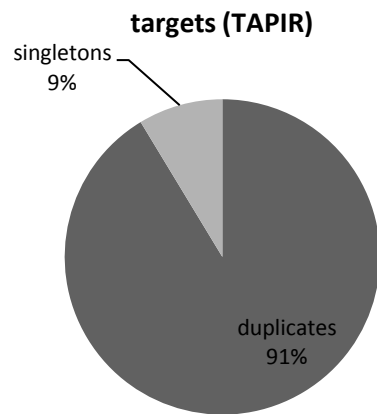

**C**

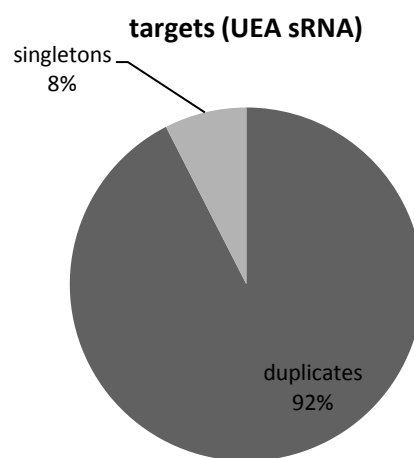







280 290 300 310 320 330 340 350 360  
AT3G59590 -----MELSF---KREKICSVENLDVPSIE-----VHSHNLPYSIPGYNGF-----FMTVEYCDGLVVYATENGIGICNP  
AT3G59610 VCKR--WNTLF---KERFFNSDLGLARPOFILLAESKICSVVNDLDGPSIEVHNLPSDIPGYKLYMPM--HVEYCDGLFLYATCYGIGI  
AT1G19715 SGHA--WDDGM---YTTVKQIIIAHG--SGIDSIQIEYD--KNGSSVWSEKRGGKGGKFF--DKVKFDYPH--EYLISVNGTYGS--FDVWGTI  
AT3G59620 -----  
AT1G73040 -----MDQ-----  
AT5G46000 NGNK--FDDGVYEGTYDGVRLKLVGEDFHGIVYLYKIYV--KNGDVVVKEHGRARGTHITETEFEVKCPD--EYITSIWGTICRN-----  
AT2G33070 IGDV--WDDGA---YDGVRRVYVGGEDGIAFVKFEYV--NGSQEVVGDERRGKKTLLG--AEFEVDPDD--YIVYVEGYHEKVFVGTKE  
AT3G16390 TGDV--WDDGV---YDNVTKVYVGGQYQYIAFVKFEYA--NGSEVVVGDHEGKTELG--VEEFEIDSD--YIVYVEGYREKVSMTS-E  
AT3G16410 GGNQ--WDDGS---EYDAVTKIQVAAGGNGIEYVVKFTYV--KNGQTEEAPLRGVKGRSFEADPFVINHPE--EHLVSVEGRYNP-----EG  
AT3G16400 MGDV--WDDGV---YENVRKVYVGGQYQYIAFVKFEYV--NGSQVVVGDHEGKTELG--VEEFEIDADD--YIVYVEGYREKVNMTS-E  
AT1G52000 -----WDDGK---HTKVKRVQLTFD--DVIRSEIEY---DGTSLKSQPRGTAGT---KIDGFTLSSDEYITEVNGYYKT---TFSGE  
AT5G39330 GGRE--WDDDV---YEGVRKVYVGGQINRITYYKFEYVQEDGQVVTTEYKIIQQ---PKEFVLQYPD--EHIIAVEGNYRG--VALCATE  
AT2G39310 GGQE--WDDDV---YEGVRKVYVGGQDLNRITYYKFEYVQEDGQVVTTEYGTNNQH--PKEFVIQYPD--EHIIAVEGNYHQ--VALIATE  
AT3G16470 GGEE--WDDGG---AYENVRKVYVGGQDSGVVYVVKFDE--KDGK--LVSHEHGKQTLG--TEEFVVDPE--YITSVKIYYEK--LFGSPIE  
AT5G38540 GKKK--WEDGF---DHDNVSKIQLVGGFEGILYIKVDYI--KNGKLETGLIHGDSGGDGFLOKMEINQSKNEYLVYVEGYYDD-----ASE  
AT5G38550 GSKK--WDDGF---DHDNVSKIQLVGGFEGILYIKVDYI--KNGKLETGLIHGDSGGDGFLOKMEINQSKNEYLVYVEGYYDD-----ASE  
AT1G52120 -----WDDGF---DHDVTKIYLVGGKTKGIDFIKIDYV--KSGKPKNGPFHGYSGG--GFLQMFEDNLKNEYLESVEGYYTN---RSGE  
AT1G52130 KSSEYMWDDGS---EHDDVTKIYVRGGTKGIEFIKFGYV--KAGELLDGSFHGYSDT--GFTQMFEDHRKNEHLLSVEGYFDY-----YND  
AT1G52110 VGTK--WDDGV---DHAGFTKIHVRSQKGIQYIKFLYVVKYHGLKDGPIHGSISG-----KVEGYYND---HDESG  
AT5G49850 VGTK--WDDGV---DQAGFTKIHVRSQKGIQYIKFLYVVKYHGLKDGPIHGSISG-----KVEGYYND---HDESG  
AT5G49870 VGTK--WDDGV---NQAGFTKIHVRSQKGIQYIKFLYVVKYHGLKDGPIHGSISG-----KVEGYYND---HDESG  
AT5G49860 -----  
AT1G60130 GGTD--WNDGA---DHEGVAKIYVRGGKRDICQYIKFDYV--KDRKIYVGPAGHVRGR--GFTEFTEINHLDNEVMVSVGYYDE-----GDSG  
AT1G60095 GGTE--WNDGA---EHEGFTKIYVQGGCDGIQYIKFDYV--KDGQHKYVSPHGVKGS--ESTEPFEINHLDKKEYLISVEGYYDE-----GDSG  
AT1G60110 GGKE--WNDGA---DHEGITKIYVRGGYEGLYVVKFDYI--KDGQYIYVSPHGVGR--GFTEFTEINHLDKKEYLISVEGYYDE-----GESG  
AT3G16460 GGTG--WDDGS---DYDGVTKIYVYVGGEGIQYVVKFDYV--KGGVTKQVVLHGKQSRQNPREFVINHPD--EYLVSVEGWYET-----  
AT1G52030 GGSAA--WDDGA---FDGVRKVLVGRNGKVFVSYVRFEYA--KGERMVPHAHGKQRE--APQEFVVDYPN--EHITSVEGTID---G  
AT1G52040 GEGE--WDDGA---EHDGVTKIYVAAGGLGIEQIRFDYV--KNGQPKBGSFHGVKGR--STISTIEISHPA--EYLISMEGWYDS-----TN  
AT3G21380 ATMS--WDDGK---HMKVKRVQITYE--DVINSIEAEY---DGDTHNPHHGTGPK---KSDGVSLSPDEYITDVTGYKYT---TGAED  
AT3G16430 -----  
AT3G16420 -----  
AT3G16440 -----  
AT3G16450 -----  
AT1G52100 VGIQ--WDDGS---DYHDVTKIYVRGGLEGIQYIKFDYV--KAGKKVIGPIHGASGR--GFTEFTEINHLLEKEYLLSIEGYYNA-----STG  
AT5G35950 GKKR--WDDGF---DYEYVTKIYVRGGLEGIQYIKFDYV--KDGKTTITGPIHGVSGR--GLTQTFEINHLQKEYLLSIEGYYDI-----STG  
AT5G35940 GGKE--WDDGF---DYEYVTKIYVRGGLEGIQYIKFDYV--KVGKTIIDGPIHGVSGR--GMTQTFEINHLQKEYLVLSIEGYYDK-----STG  
AT1G58160 -----  
AT1G57570 GGNQ--WDDGT---NNDGVTKIYVRGGVEGIQYIKFDYV--KSGQVQVHGSVHGLS--GFTQTFEIDHLNNEHLVLCVVEGYYDD-----ESG  
AT1G61230 GGIQ--WDDGA---DHEGITKIYVRGGFEGIQYIKFDYV--KSGQVQVHGSVHGLS-----EGYYDD-----EST  
AT1G52050 GKKR--WDDGA---NDNVAKYVIRGDHEGIQYIKFDYV--KDGQVQVHGSVHGLS--GFTQTFEIDHLQYEQIVSVVEGYYDW-----KTG  
AT1G52060 GGKE--WDDGA---GHDNVAKYVIRGGLEGIQYIKFDYV--KDGQVQVHGSVHGLS--GFTQTFEIDYQNGEYIVSVVGYFDK-----SG  
AT1G52070 GKKQ--WDDGA---DHDNVAKYVIRGGLEGIQYIKFDYV--KDGKTIIDASIHGVSGS--GFTQTFEIDYQNSEYIVSVVGYDYK-----SG  
AT2G25980 GGNQ--WDDGA---DHDNVTKIYVRGGLEGIQYIKFDYV--KAGQVQVHGSVHGLS--GFTQTFEINHLNGEYIVSVVGYDYK-----ISG  
AT5G28520 RGLQ--WDDSS---DHDNVTKIYVRGGREGIQYVVKFDYV--KSGQVQVHGSVHGLS--GFTQTFEIDQKD--EHLVSVVEGYYDV-----TKG  
AT1G33790 GGNQ--WDDLA---DHDHVTKIYVQGGQEGIQYVVKFDYV--KNGQVQVHGSVHGLS--GFTQTFEIDPTN--EHLVSVVEGYYDE-----SKG  
AT1G05760 -----  
AT1G05770 -----MEGKIKIP-----  
AT2G43730 -----  
AT2G43740 -----

```

          370       380       390       400       410       420       430       440       450
.....|.....|.....|.....|.....|.....|.....|.....|.....|.....|.....|.....|.....|.....|.....|.....|
AT3G59590 LLRQIRWIKSKVNYRYNGVGYDNSR-----PENHYKIFES-CPYSDDTVVKASITEFVSDAWIS-----
AT3G59610 CNPWLRQ-IRWFKSSYEGYDFSG-----MGYDNSRQDKHYKILGSYCTN-----
AT1G19715 CVRSLTF-ESNR-RKYGPFVGS-----GTFAL-PKSGSKIIGF-HGKAGWYLDATGVHTQPIPKENNPSSKILLHSHQSFSGDKKHE
AT3G59620 -----MAERM-----
AT1G73040 -----QQQGDKNLT-----
AT5G46000 --DHHRY-KSTGGRTFEQL--TAAD--KYDINL-AAKMGTPMYW-NTVSELQFKTSHGRTS-----
AT2G33070 IISTLTF-KTYKGKTSPPFGIVS-G--TKFVL--QGGKIVGF-HGRSTDVLSLHSLGAYIS-----
AT3G16390 MITFLSF-KTSKGKTSQPIVKKP-----GVKFVL--HGGKIVGF-HGRSTDVLSLHSLGAYVS-----
AT3G16410 LILGLTF-KSNK-KTSDLIGYED--GTPFTL-QVQDKKIVGF-YGFAGNNLHSLGAYF-----
AT3G16400 MITFLSI-KTFKGKTSHPIEKRP-----GVKFVL--HGGKIVGF-HGRSTDVLSLHSLGAYVS-----
AT1G52000 VITSLTF-KTNK-RTYGTYGNT-----SSYFVAAPKDNQIVGF-LGSSSHALNSIDAHFAPAPPPGSTGAKPGASGIGSDSGSIGSAG
AT5G39330 VITNLVF-KTSKGRKSLFPGPNLLGITGTFKVI-EDGGKKIVGF-HGRSGNALDALGVYFVHGSLTTS-----
AT2G39310 VITSLVF-KTSK-----GF-HGRAGDAVDALGVYFVLDT-TTS-----
AT3G16470 IVTALIF-KTFKGKTSQPFGLTS-----GEEAEL--GGGKIVGF-HGSSDLIHSVGVYIIPST-----
AT5G38540 TIQGLHF-QTNL-NNPVMMGYKK--GRKFLL-ASNGNKIIGF-HGYADKSLNSLHSLGAYFSRA-----
AT5G38550 TIQGLHF-QTNL-NNPVMMGYKK--GRKFLL-ASNGNKIIGF-HGYADKSLNSLHSLGAYFSTT-----
AT1G52120 FIGAIQF-KTNL-RVSEIIGYSYWG--LKKFKL-AKHGNKIIGF-QGSAEYRLKDLDAYFTPI-----
AT1G52130 IMYAIQF-KTNL-KISEIMGYEYSG--HKFTL-AMEGKKIIGF-HGFADVNLRALGAYVTWI-----
AT1G52110 VIQALRF-KTNI-KTSELMGSNT-G--KKFRL-AASEMKIVGF-HGYAGKNLRSLSLHSLGAYFTPI-----
AT5G49850 VIQALRF-KTNV-KTSQMLGPKT-----GKKFRL-AASEMKIVGF-HGYAENLTSLSLHSLGAYFTPI-----
AT5G49870 VIQGLQF-RTNI-KTSELMGSNT--GKKFKL-TASGMKIVGF-HGYAENLSSLGAYLTP-----
AT5G49860 -----
AT1G60130 IIQGIQF-RTNI-KTSELIGYNN--GKKFSL-AANGKKIIGF-HGYADQNLNSLHSLGAYFT-----
AT1G60095 VIQGIQF-KTNI-KTSELIGDKK--GRKFSL-AANGKKIIGF-HGYADKSLNSLHSLGAYFTT-----
AT1G60110 VIQGIQF-KTNI-RTSELMGDNR--GRKFSL-AANGKKIIGF-HGYAENLNSLHSLGAYFTT-----
AT3G16460 VMLGIQF-KTNL-NTYEVSIYPF-EPSTDTKFTL-QVQDKKIIIGF-HGFAGNHVNSIGAYFVPKSSTTPVPS-----
AT1G52030 YLSSLKF-TTSKGRTPVVF--GNVVGSKFVF-EETSFKLVGF-CGRSGEALDALGAHFAP-----LPAPTAPAPAPAPAPAP
AT1G52040 IIQGIQF-KSNK-HTSQYFGYEFGL--DGTQFSL-QVNDNKIISF-HGFADSHLNSVGFAYFAPISSSLTT-----
AT3G21380 AIAALAF-KTNK-TEYGPYGNKT-----RNQFSIHAPKDNQIAGF-QGISSNVLNSIDVHFAPLPS-----
AT3G16430 -----
AT3G16420 -----
AT3G16440 -----
AT3G16450 -----
AT1G52100 VIQCLQF-ITNK-KTYDPIGYNE--GARFTL-SASRSKIIGF-HGFADKYLNSLHSLGAYFIKI-----
AT5G35950 VIQSIQF-KTNQ-QTSDMMGFNE--GTFKSL-RSMRGRIGF-HGFADKNLYSLRAYYIRI-----
AT5G35940 VIQSIQF-KTNV-KTSDMMGFNK--GTFKSL-GIIRNKIIGF-HGFSDKNVYSLGAYFIKV-----
AT1G58160 -----
AT1G57570 VIQALQF-KTNI-KTSELLGYKK--GKKFSL-VDKRKKIVGF-HGYADKSLNSLHSLGAYFTTV-----
AT1G61230 AIQALQF-KTNI-KTSELLGYEK--GKKFSL-ADKGGKIIGF-HGYAENLISLHSLGAYFTTV-----
AT1G52050 VMQALQF-KTNL-KTSEFIGYQK--GTFKSL-GVDGKIVGF-HGSAWRSLSLHSLGAYVKT-----
AT1G52060 VMQALEF-KTNR-KTSEVIGYPSN--TKFSLGGVNGKMINGF-HGSAGKALNSIGAYLTKV-----
AT1G52070 TMQALEF-KTNL-KTSEVIGYPK--GTFKSLGGVNGKMINGF-HGSAGKALNSIGAYLTKV-----
AT2G25980 VIQALQF-ETNQ-RSSEVMGYDDTG--TKFTL-EISGNKITGF-HGSADANLKSLSLHSLGAYFTPP-----
AT5G28520 VIQALKE-KTNK-KTSEMIGYDDTG--IKLSSL-EVKGKKIIGF-HGYAETNLNSLHSLGAYFTTT-----
AT1G33790 LVQGLKF-KTNK-KTSDMIGYDENG--LKFSL-EVNGKKIIGF-HGYAETNLNSLHSLGAYFVTA-----
AT1G05760 -----MKIGPVG-----
AT1G05770 -----
AT2G43730 -----MKSRNREMF-----KVGPIG-----
AT2G43740 -----RREMEKVGPIGS-----

```

|           | 460                                                                                     | 470 | 480 | 490 | 500 | 510 | 520 | 530 | 540 |
|-----------|-----------------------------------------------------------------------------------------|-----|-----|-----|-----|-----|-----|-----|-----|
| AT3G59590 | ..... ..... ..... ..... ..... ..... ..... ..... ..... .....                             |     |     |     |     |     |     |     |     |
| AT3G59610 | -----                                                                                   |     |     |     |     |     |     |     |     |
| AT1G19715 | YSVLQGSVGNFDIVVTLRKKDPTLPSFESRDSAGAEV-----                                              |     |     |     |     |     |     |     |     |
| AT3G59620 | -----                                                                                   |     |     |     |     |     |     |     |     |
| AT1G73040 | -----                                                                                   |     |     |     |     |     |     |     |     |
| AT5G46000 | -----                                                                                   |     |     |     |     |     |     |     |     |
| AT2G33070 | -----                                                                                   |     |     |     |     |     |     |     |     |
| AT3G16390 | -----                                                                                   |     |     |     |     |     |     |     |     |
| AT3G16410 | -----                                                                                   |     |     |     |     |     |     |     |     |
| AT3G16400 | -----                                                                                   |     |     |     |     |     |     |     |     |
| AT1G52000 | TNPGADGTRETEKNAGGSKPSSGSAGTNPASAVGNGETEKNAGGSKPSSGSAGTNPASAGGNGETEKNVGGSKPSSGKAGTNPANAG |     |     |     |     |     |     |     |     |
| AT2G39330 | -----                                                                                   |     |     |     |     |     |     |     |     |
| AT2G39310 | -----                                                                                   |     |     |     |     |     |     |     |     |
| AT3G16470 | -----                                                                                   |     |     |     |     |     |     |     |     |
| AT5G38540 | -----                                                                                   |     |     |     |     |     |     |     |     |
| AT5G38550 | -----                                                                                   |     |     |     |     |     |     |     |     |
| AT1G52120 | -----                                                                                   |     |     |     |     |     |     |     |     |
| AT1G52130 | -----                                                                                   |     |     |     |     |     |     |     |     |
| AT1G52110 | -----                                                                                   |     |     |     |     |     |     |     |     |
| AT5G49850 | -----                                                                                   |     |     |     |     |     |     |     |     |
| AT5G49870 | -----                                                                                   |     |     |     |     |     |     |     |     |
| AT5G49860 | -----                                                                                   |     |     |     |     |     |     |     |     |
| AT1G60130 | -----                                                                                   |     |     |     |     |     |     |     |     |
| AT1G60095 | -----                                                                                   |     |     |     |     |     |     |     |     |
| AT1G60110 | -----                                                                                   |     |     |     |     |     |     |     |     |
| AT3G16460 | -----                                                                                   |     |     |     |     |     |     |     |     |
| AT1G52030 | APSPAPASAPVPAPAPTPAP-----                                                               |     |     |     |     |     |     |     |     |
| AT1G52040 | -----                                                                                   |     |     |     |     |     |     |     |     |
| AT3G21380 | -----                                                                                   |     |     |     |     |     |     |     |     |
| AT3G16430 | -----                                                                                   |     |     |     |     |     |     |     |     |
| AT3G16420 | -----                                                                                   |     |     |     |     |     |     |     |     |
| AT3G16440 | -----                                                                                   |     |     |     |     |     |     |     |     |
| AT3G16450 | -----                                                                                   |     |     |     |     |     |     |     |     |
| AT1G52100 | -----                                                                                   |     |     |     |     |     |     |     |     |
| AT5G35950 | -----                                                                                   |     |     |     |     |     |     |     |     |
| AT5G35940 | -----                                                                                   |     |     |     |     |     |     |     |     |
| AT1G58160 | -----                                                                                   |     |     |     |     |     |     |     |     |
| AT1G57570 | -----                                                                                   |     |     |     |     |     |     |     |     |
| AT1G61230 | -----                                                                                   |     |     |     |     |     |     |     |     |
| AT1G52050 | -----                                                                                   |     |     |     |     |     |     |     |     |
| AT1G52060 | -----                                                                                   |     |     |     |     |     |     |     |     |
| AT1G52070 | -----                                                                                   |     |     |     |     |     |     |     |     |
| AT2G25980 | -----                                                                                   |     |     |     |     |     |     |     |     |
| AT5G28520 | -----                                                                                   |     |     |     |     |     |     |     |     |
| AT1G33790 | -----                                                                                   |     |     |     |     |     |     |     |     |
| AT1G05760 | -----                                                                                   |     |     |     |     |     |     |     |     |
| AT1G05770 | -----                                                                                   |     |     |     |     |     |     |     |     |
| AT2G43730 | -----                                                                                   |     |     |     |     |     |     |     |     |
| AT2G43740 | -----                                                                                   |     |     |     |     |     |     |     |     |







|           | 730      | 740                 | 750               | 760       | 770  | 780                      | 790 | 800                               | 810 |
|-----------|----------|---------------------|-------------------|-----------|------|--------------------------|-----|-----------------------------------|-----|
| AT3G59590 | ---KP--- | YEFAYD              | ---               | WDF       | ---  | MSSYSVSLNG               | --- | ALYWVAFHMASDDQFTQSFDFSTE          |     |
| AT3G59610 | ---      | TTMNASVTE           | ---               | LGSDA     | ---  | WKSYEFAFHSWNLSMSPYSVSLNG | --- | NLYWVAYNHESRDYFIQSFDFSTV          |     |
| AT1G19715 | ---      | TKHKLVTDEKSQSKI     | EGGAKTYGPWGGTGGIM | ---       | FDD  | ---                      | --- | GI-YTGIRQIN--LSRNVGIVSM--KVCY-DF  |     |
| AT3G59620 | ---      | SRDHADFVA           | ---               | HGGTE     | ---  | WDD                      | --- | GA-FVNVKKIK-IFHDWAGITLV--QFDYIDG  |     |
| AT1G73040 | ---      | VFVGPWGGN           | ---               | GGTT      | ---  | WDD                      | --- | GI-YDGVREIR-LVYD-HCIDS--SVIY-DK   |     |
| AT5G46000 | ---      | EQ                  | ---               | FRMPGTGGS | ---  | NGVS                     | --- | WDD                               | --- |
| AT2G33070 | ---      | SP                  | ---               | ATPKLRGKW | ---  | IKVEQ                    | --- | KGE                               | --- |
| AT3G16390 | ---      | LP                  | ---               | STPKLLGNW | ---  | IKVEQ                    | --- | NGE                               | --- |
| AT3G16410 | ---      | APLTNVTPLNAKLEAKGGD | ---               | TGDI      | ---  | WDD                      | --- | GV-YDNVRKVY-VGQAQYGIQV--KFEY-VN   |     |
| AT3G16400 | ---      | LS                  | ---               | STIKLLGKW | ---  | IKVEQ                    | --- | KGE                               | --- |
| AT1G52000 | SNTNSSP  | ---                 | OKLEAQQGN         | ---       | GGNQ | ---                      | --- | WDD                               | --- |
| AT2G39330 | ---      | PPV                 | ---               | YKLDAGGGT | ---  | GGTE                     | --- | WDD                               | --- |
| AT2G39310 | ---      | TPFPL               | ---               | YKLDAGGGT | ---  | DGRV                     | --- | WDD                               | --- |
| AT3G16470 | ---      | PLTPPVSGGLTKLEAQQGR | ---               | GGDV      | ---  | WDD                      | --- | GGAYDNVKKVY-VGQGDGSGVVYV--KFDY-EK |     |
| AT5G38540 | ---      | TP                  | ---               | NKLECGQDC | ---  | RGMS                     | --- | WDD                               | --- |
| AT5G38550 | ---      | TP                  | ---               | NKLECGQDR | ---  | GGTE                     | --- | WDD                               | --- |
| AT1G52120 | ---      | TP                  | ---               | TRMEAQQGN | ---  | GGTK                     | --- | WDD                               | --- |
| AT1G52130 | ---      | TP                  | ---               | ARMEAKGKK | ---  | GGTE                     | --- | WDD                               | --- |
| AT1G52110 | ---      | TP                  | ---               | TKLAWQGT  | ---  | LGTL                     | --- | WDH                               | --- |
| AT5G49850 | ---      | IP                  | ---               | TKLECGQVT | ---  | ERSTL                    | --- | WDS                               | --- |
| AT5G49870 | ---      | TP                  | ---               | KKSECKGIT | ---  | DGSNVWNWDD               | --- | ---                               | --- |
| AT5G49860 | ---      | ---                 | ---               | ---       | ---  | MDS                      | --- | ---                               | --- |
| AT1G60130 | ---      | TS                  | ---               | PFIKLESRE | ---  | STGDL                    | --- | WDD                               | --- |
| AT1G60095 | ---      | SPLI                | ---               | SLEHTTGSD | ---  | LVNHI                    | --- | WDD                               | --- |
| AT1G60110 | ---      | SPF                 | ---               | TKLEV-GTT | ---  | SADL                     | --- | WDD                               | --- |
| AT3G16460 | ---      | TP                  | ---               | LKLTAEQGE | ---  | TGAV                     | --- | WDD                               | --- |
| AT1G52030 | ---      | PP                  | ---               | NKVEALGGN | ---  | GGTI                     | --- | FDD                               | --- |
| AT1G52040 | ---      | TP                  | ---               | NKVEAQQGN | ---  | GGTE                     | --- | FDD                               | --- |
| AT3G21380 | ---      | SSSSSSLSQANKVDAQGGK | ---               | GGTS      | ---  | WDD                      | --- | GA-HDHVRRVY-IGQGDGSGVTVV--KFEY-EK |     |
| AT3G16430 | ---      | MA                  | ---               | OKVEAKGKK | ---  | GGNQ                     | --- | WDD                               | --- |
| AT3G16420 | ---      | MA                  | ---               | OKVEAQQGK | ---  | GANL                     | --- | WDD                               | --- |
| AT3G16440 | ---      | MA                  | ---               | OKVEAQQGI | ---  | GGDV                     | --- | WDD                               | --- |
| AT3G16450 | ---      | MA                  | ---               | OKVEAGGGA | ---  | GGAS                     | --- | WDD                               | --- |
| AT1G52100 | ---      | PS                  | ---               | IQSAIEGAK | ---  | TTGKG                    | --- | FDD                               | --- |
| AT5G35950 | ---      | PA                  | ---               | TKSAMQGGQ | ---  | NTGRG                    | --- | YDH                               | --- |
| AT5G35940 | ---      | LA                  | ---               | TKSGMQGGQ | ---  | NTGKS                    | --- | YDY                               | --- |
| AT1G58160 | ---      | MA                  | ---               | DKLEAKGGN | ---  | GGKI                     | --- | WDD                               | --- |
| AT1G57570 | ---      | SP                  | ---               | TKSECYGSS | ---  | KGIY                     | --- | WDD                               | --- |
| AT1G61230 | ---      | SV                  | ---               | TKSVCHGSK | ---  | IIES                     | --- | WDD                               | --- |
| AT1G52050 | ---      | AP                  | ---               | TKSELQGGI | ---  | TGGEY                    | --- | WDD                               | --- |
| AT1G52060 | ---      | PP                  | ---               | TKSELVGGW | ---  | GGDY                     | --- | WDD                               | --- |
| AT1G52070 | ---      | PP                  | ---               | TKSQLVGGI | ---  | TGGEY                    | --- | WDD                               | --- |
| AT2G25980 | ---      | PP                  | ---               | IKQEQGGT  | ---  | GGSP                     | --- | WDH                               | --- |
| AT5G28520 | ---      | GP                  | IGLNPQVGH         | IKLAYQGGG | ---  | GGIP                     | --- | WDH                               | --- |
| AT1G33790 | ---      | PP                  | ---               | TKFDYQGGG | ---  | GAQL                     | --- | WDD                               | --- |
| AT1G05760 | ---      | ---                 | ---               | KHDARSTT  | ---  | IVN                      | --- | WDE                               | --- |
| AT1G05770 | ---      | ---                 | ---               | VGTDYSGKK | ---  | TMVD                     | --- | WDE                               | --- |
| AT2G43730 | ---      | ---                 | ---               | SKQYYDKS  | ---  | ---                      | --- | WEE                               | --- |
| AT2G43740 | ---      | ---                 | ---               | GRAYLKNLE | ---  | ---                      | --- | WEE                               | --- |

820 830 840 850 860 870 880 890 900

AT3G59590 KFEPLYCLLPNKKCDPSNAR-----SLAV--FRG-DRFSY--LEQNYE-----TRNIEIIVVTKK-EIKIENGKAVEWMNLMKVS  
AT3G59610 SFKHYCILPTKNGHRCQDGRSLAIFR---EDRF-SFLEQEIYNTRNIEIIVVTKETIKNGDGEAVEWVNLMSVLVPEWSSLSVNYPPSYF  
AT1G19715 RGQAVWG--SKHGGVGGFK-----HD---KIVF-DYPS-EVLTH--VTGTYG-----PLMYMGPVNIKSL-TFRTNRGKHGP-YG---EE  
AT3G59620 TGAIVSG--LDHGTE-----PF-----KIVF-DYPS-EVLTH--VTGTYG-----PLMYMGPVNIKSL-TFRTNRGKHGP-YG---EE  
AT1G73040 NGKPAKS--EKHGGVGGNK-----TS---EIKL-QYPE-EYLTG--VSGYYC-----PMVNSGTPVIRSM-TFKSNQVYGP-YG---VE  
AT5G46000 GNDRI-T--HCHGKDSKEH-----SIS---PATG-DVPHLSCLGV--RMVSISSLYVFGGRDASRKYNQGFYSFDTTNEWKLLTPVEEGP  
AT2G33070 QPIDKHL--YVFDLETRTW---SIS---PATG-DVPHLSCLGV--RMVSISSLYVFGGRDASRKYNQGFYSFDTTNEWKLLTPVEEGP  
AT3G16390 QPIDKHL--YVFDLETRTW---SIA---PATG-DVPHLSCLGV--RMVSVGSLTYTFGGRDFSRQYNGFYSDTTNEWKLLTPVEEGP  
AT3G16410 GSQVVG--DEHGKKTGELG---VE---EFEI-D-AD-DYIVY--VEGYRE-----KVNGMTSEMITFL-SFKTYKGTKSQPIE---QR  
AT3G16400 QPIDKHL--YVFDLETRTW---SIS---PATG-DVPHLSCLGV--RMVSVGSLTYTFGGRDASRKYNQGFYSFDTTNEWKLLTPVEEGP  
AT1G52000 NGQLKEG--PFHGVKGRGG---TS---TIEI-SHPD-EYLVV--VEGLYD-----SSNIQGI-QFQSNK-HTSQYFGYEEYG  
AT5G39330 GQKLET--CRHGVKTERS-----LKFEL-N-PD-EYIKS--VEATYD-----KPDFERNVVITSL-TFKTSKGRTS-FSG---YK  
AT2G39310 DGEAKT--CNHGGKGDTP-----S---EFVL-GYPD-EYIKS--VEATYQ-----KPNIFSNTAITSL-KFLTSKGRTS-FFG---YN  
AT3G16470 DGKIVS--LEHGKQTLG---TE---EFEI-D-PE-DYITY--VKVYYE-----KLFQSPIEIVTAL-IFKTFKGTKSQPFQ---LT  
AT5G38540 GQKVEKT--PYRRDVKNEK-----EFVL-DYPN-EFITS--VEGTLA-----APKSVNITWITSL-TFKTSKRRSSPTFG---SA  
AT5G38550 GQKVEKT--PYRRDVKNEK-----EFVL-DYPN-EFITS--VEGTLA-----TPTNFDITWILSL-TFKTSKGRTS-PTFG---SSS  
AT1G52120 DGDPEKE--QLHGSETGRG---YTLE---PFEI-NHSDKEYLLS-IDGCYD-----EDSGVIQSL-QLKTNI-KTSEVMG---DDE  
AT1G52130 DGHPKS--EYHGPTSGQG---YVLE---PFEI-NHLDKEYLMS-IDGYYD-----DASGVIQAL-QFKTNM-KTSELMGYDDD  
AT1G52110 DGKVEK--RDHGMQDGYG---GEEV---EFVV-DYPN-EFITS--VVG TMS-----TDRVASL-TFKTSKGRTSQRFGDRTAN  
AT5G49850 DGKVVK--RAHGMNDLSR---ITD---EFVV-DYPN-EFITS--VVG TMS-----DSVTSF-VFKTSKGRTSRFTFGERTSD  
AT5G49870 AGKVVK--RSHGLNNDH---QEE---KFVV-DYPN-EFITS--VVG TMS-----SSVMPL-IFKTSKGRTSKQFGDYSD  
AT5G49860 -----ITSL-TFKTSKGRTSKQFGDYSD  
AT1G60130 RGEVEN--RDLGLRVFIA---EEG---EFVV-NYPY-EFIS--VEGTF-----NEKDPHVASL-TFKTSKGRTSSTFG---TP  
AT1G60095 KGKVEK--REHGMFYSWV---QQG---EFVV-DYPN-EFITS--VEGTR-----TESFMQVASL-TFKTSKGRTSSTFG---SP  
AT1G60110 KGKVEK--REHGIMIAPFIERG---EFVV-DYPN-EFITS--VEVTISKQNDSPVPSLTSETVASL-TFKTSKGRTSSTFG---SP  
AT3G16460 GSQVVG--DEGRTRTLG---FE---EFEL-E-SD-EYITS--VEGYE-----KNFGVDT-VVTTL-IFKTSKNTAGPFG---IV  
AT1G52030 DGKRET--REHGKMTVLG---TE---EFEV-E-SD-DYITS--IEVSVD-----NVFGFKSEIVTSL-VFKTFKGTISQPFQ---ME  
AT1G52040 DGKRET--RDHGMKTLG---TE---EFEV-D-SD-DYITS--IEVSVD-----KVFYNSSEIVTSL-VFKTSKGRTS-PTFG---MV  
AT3G21380 DDKKES--REHGKKTLLG---AE---VFEV-D-PD-DYITS--VEVQSD-----RIFGQDTEVITSL-IFKTSKGFSPFPFG---LE  
AT3G16430 NGQTEQT--PLRGIKSTI---PTD---PFVI-NHPE-EHLVS--IEIWK-----PDGLIQGL-RFISNK-KTSREFIG---YD  
AT3G16420 NGQPEQA--PLRGTGRVL---PAD---PFVI-NHPD-EHLVS--VEGWYS-----PEGIIQGI-KFISNK-KTSDVIG---SD  
AT3G16440 GSQEVVG--GEHGKKSLLG---IE---TFEV-DADD--YIVA--VQVTYD-----KIFGYDSDIITSI-TFSTFKGTSPPYG---LD  
AT3G16450 DSQDVEG--GEHGKKTLLG---FE---TFEV-D-AD-DYIVA--VQVTYD-----NVFGQSDIITSI-TFNTFKGTSPPYG---LE  
AT1G52100 AGQVET--REGAKTGTQ---H---EFTV-NHPY-EYITS--VEGTYA-----HTQPYNCVLTSL-TFKTSKGRASPAIG---KV  
AT5G35950 VGQVEC---YEGVKTGTQ---N---QFTI-NYPY-ECITS--VGGSYA-----DTQPYRCIVLRSL-TFKTSNGRTS-VFG---KE  
AT5G35940 AGQVEC---YEGDKTGTQ---YKIV-NYPY-ECITS--VEGSYA-----NTQPYGCIVLRSL-TFKTSNGRT-LVIG---TV  
AT1G58160 NGQPKAG--STHGVSYHNF---TE---WFDL-NHTCDEHILS-VKCYD-----DGEIQGL-VIKTNI-RTSAYMG---YN  
AT1G57570 RAVVV---RQHGWNISIVE--EDGK---EFEL-DYPN-ELITS--VEGTMK-----SFSRSEIRISSL-TFKTSKGRTSPTIG---IA  
AT1G61230 HSVVK---RQHGNNISLV---E---EFEL-NYPN-EFITS--VDGTFK-----NSGMRKVMCVTSL-VFKTSKGRISPTYG---SV  
AT1G52050 DGQVVT---RYHGMKNGET---Q---EFAV-DYPN-EYMTS--VEGTYD-----HISEGNLVLTLTSL-TFKTSKGRISQTFG---LV  
AT1G52060 DGQVVT---SSHGNKEGET---E---EFAI-DYPN-EFLIS--VEGTYD---SILFPDHYVLVITSL-SFKTSKGRISPTYG---VV  
AT1G52070 DGQVVT---RYHGMKNGDT---E---EFAI-DYPN-EYMTS--VEGTYD---SILFPDHYVLVITSL-SFKTSKGRISPTYG---VV  
AT2G25980 DGKRET--RDHGMKNGDT---E---EFAI-DYPN-EYMTS--VEGTYD---SILFPDHYVLVITSL-SFKTSKGRISPTYG---VV  
AT5G28520 GGVV---ROYEPINGYD-----MFEVKEYPT-EYIIS--VECTYD-----DVIPIRSGRRMIRSI-MFKTSKGRVSPIFG---YP  
AT1G33790 GGLIER---REYGGNVGRQ---E---EFVV-DYPS-EYIIS--MECTYD-----IVSDASKNRVRSI-MFKTSKGRVSPIFG---KV  
AT1G05760 DGKLVLS--DRHGPFSGNM---FD---VIEL-NYPH-EYITG--ISGEYY-----KYEANNPHMRSI-KFNTNTSEYGP-FGTSGSS  
AT1G05770 DDTFFLS--SCHGQNTGSM---FD---VILL-NCPH-EYITG--ISGEYL-----KSDGASGPQIRSL-AFATNLNQYGFPGG---SSS  
AT2G43730 GVHVVS---EKHGSSKQGS-----YEIV-RLNDDYVTC--LSGIFW-----ERKVTSL-TFHNTQKKGHPFCNGTGS  
AT2G43740 GGHVVS---KKYGMSDAQKQKYGSYNCRFHVVMV-RLNDDYVTC--LSAIYL-----CKGITNL-NIHTNQKKGHPICDRYSS

|           | 910      | 920      | 930     | 940          | 950      | 960      | 970       | 980          | 990                              |
|-----------|----------|----------|---------|--------------|----------|----------|-----------|--------------|----------------------------------|
| AT3G59590 | VPKWSSLR | EKACIYIA | KGDK    | FHEIIIND     | LVVEYPT  | RHHRT    | YVPS      |              |                                  |
| AT3G59610 | VDEDKVGL | TLTVIC   | CYKKEG  | KAYIYIA      | KGDKFHEI | EIKDLVEY | NPR       |              |                                  |
| AT1G19715 | QG       | PSFTHQ   | MDEGKVV | GFLGREGL     | F        | FLDSIGVH | VMECKI    |              |                                  |
| AT3G59620 | EG       | ARAEFWLR | DDEYI   |              | TIVTAF   | GGY      |           |              |                                  |
| AT1G73040 | QG       | TPFTFS   | VNGGRIV | GMNGRSGW     | Y        | LDSIGFH  |           |              |                                  |
| AT5G46000 | VG       | TKFQLEAK | GFDKIV  | GFRGRSSV     | NRLNAL   | GAN      | FAVV      |              |                                  |
| AT2G33070 | TP       | RSFHSMTA | DENNVV  | VFGVSAT      | VRLKTL   | DAY      | NIVDH     |              |                                  |
| AT3G16390 | TP       | RSFHSMAA | DEENVV  | VFGVGAM      | DRIKTL   | DSY      | NIVDK     |              |                                  |
| AT3G16410 | PG       | IKFVLQ   | GGKIV   | GFHGR        | ST       | DVLD     | SLGAYISL  | SPTPNLHGKWKV | DENGDGPGLRCSHDIAQVGNKIYSFGGEFTPN |
| AT3G16400 | TP       | RSFHSMAA | DEENVV  | VFGVSAT      | ARLNTL   | DSY      | NIVDK     |              |                                  |
| AT1G52000 | DG       | TQFSLQ   | VNEKKI  | GFHGFADS     | HLNSL    | GAY      | FVPI      | S            |                                  |
| AT5G39330 | GG       | KKFKLE   | QKGRRLV | GFHKGEGS     | AIDAL    | GAY      | FAP       |              |                                  |
| AT2G39310 | VG       | KKFVLE   | QKGRRLV | GFHKGEDA     | AIDAL    | GAY      | FGPV      |              |                                  |
| AT3G16470 | SG       | EEAELG   | GGKIV   | GFHGTSSD     | LHSL     | GAY      | IIPS      |              |                                  |
| AT5G38540 | SS       | RKFVLE   | KNGSPLV | GFHGYNSV     | GNTLNSL  | GAY      | YRPI      |              |                                  |
| AT5G38550 | PG       | RKFVLE   | KNGSALV | GFHYIGP      | GYNIKAL  | GAY      | YRPI      |              |                                  |
| AT1G52120 | KG       | TKFTLG   | CNGHEI  | GFHGSAD      | NLNAL    | GAY      | ITTLT     |              |                                  |
| AT1G52130 | A        | VKFTIG   | CTVNKI  | GFHGHAGK     | NLYSL    | GAY      | FTTL      |              |                                  |
| AT1G52110 | L        | VEFVLE   | NKDCAI  | VFHGWTP      | SYLTAL   | GAY      | SFPM      |              |                                  |
| AT5G49850 | S        | VEFVIE   | SKGCAV  | GFHWYAPL     | GAGYI    | TALGAH   | FYPM      |              |                                  |
| AT5G49870 | DS       | VEFVLE   | SKGCAI  | VFHWHNP      | VSGYMTAL | GAY      | YYPM      |              |                                  |
| AT5G49860 | DS       | VEFVLE   | SKGCAI  | VFYGWYKT     | GSGYTAL  | GAY      | YYPM      |              |                                  |
| AT1G60130 | GT       | KKFVLQ   | SKGCGV  | GFHGVLSN     | DYISGL   | GAY      | FRL       |              |                                  |
| AT1G60095 | SD       | KKFVLE   | SKGCGV  | GFYGRCS      | SIFDL    | GAY      | FRL       |              |                                  |
| AT1G60110 | AT       | KKFVLQ   | SKGCGV  | GFGRSSY      | YTYAL    | GAH      | FCPL      |              |                                  |
| AT3G16460 | SG       | TKFEFK   | KEGYKI  | TGFHGR       | AG       | EYVNAI   | GAY       | LAPS         |                                  |
| AT1G52030 | TE       | KKLELKD  | GKGGKLV | GFHGR        | AS       | DVLYAL   | GAY       | FAPTT        |                                  |
| AT1G52040 | TE       | KKFELKD  | GNGGKLV | GFHGR        | AS       | DVLYAL   | GAY       | FAPS         |                                  |
| AT3G21380 | GS       | QKYELKD  | GNGGKLV | GFHGRVGG     | ELLNAL   | GAY      | FAPS      |              |                                  |
| AT3G16430 | RG       | TRFVLQ   | VQDKKI  | GFHGSAGD     | NLNNSL   | GAY      | FAPL      |              |                                  |
| AT3G16420 | EG       | THFTLQ   | VKDKKI  | GFHGSAGG     | NLNNSL   | GAY      | FAPL      |              |                                  |
| AT3G16440 | TE       | NKFVLE   | KNGGKLV | GFHGRAGE     | ILYAL    | GAY      | FTTT      |              |                                  |
| AT3G16450 | TQ       | KKFVLE   | KNGGKLV | GFHGRAGE     | ALYAL    | GAY      | FATT      |              |                                  |
| AT1G52100 | TG       | SKFKLE   | RQGD    | AI           | VFHGR    | VG       | SCIDGIGVY | YAPL         |                                  |
| AT5G35950 | TG       | TTFLE    | SQGN    | AI           | VFHGRVGS |          | CVDSIGY   | YAPF         |                                  |
| AT5G35940 | TG       | TKFLE    | SKGN    | AI           | VFHGRVGS |          | CVDSIGY   | YAPF         |                                  |
| AT1G58160 | IG       | TTFTLE   | VKGGKLV | GFHGSF       | DK       | NLTS     | L         | GAY          | FAPL                             |
| AT1G57570 | SG       | TKFLLA   | SKGCAV  | GFYGRHDD     | RDLVAI   | GAY      | FSPL      |              |                                  |
| AT1G61230 | TG       | TKFVLE   | TKDCAL  | AGFHWTF      | L        | GFLTAI   | GAY       | FSLL         |                                  |
| AT1G52050 | IG       | TKFVLE   | TKGNV   | ISGFHGRDGG   | SFDAI    | GAY      | FSPI      |              |                                  |
| AT1G52060 | SG       | TKFVLE   | SQGN    | AI           | VFYGRNGG |          | AFDAIGVY  | FSPI         |                                  |
| AT1G52070 | SG       | TKFVLE   | SQGN    | AI           | VFYGRDGG |          | AFDAIGVY  | FSPI         |                                  |
| AT2G25980 | SE       | RTFVFE   | SKGR    | ALVGLHGRCC   | WAI      | DALGAH   | FGAP      |              |                                  |
| AT5G28520 | AA       | RKFVLE   | NNGGAL  | GFHGRVGA     | GIDAL    | GAY      | FSSF      |              |                                  |
| AT1G33790 | AA       | RKFVFE   | SNGSAL  | GFHGRAAA     | AVDAI    | GAY      | FSRF      |              |                                  |
| AT1G05760 | ND       | KFAFKL   | GKSPQ   | FGFHGT       | YDA      | SGLQYI   | GVY       | L            | LRPK                             |
| AT1G05770 | QSSIWN   | HEQQFR   | EKLGKFR | QFSGFY       | TYNA     | SGLQNI   | GVY       | L            | QPT                              |
| AT2G43730 | SSY      | MADYKKEI | DVKIRDR | REFGGFFGSFDD | EFDGLT   | SIGIY    | VYPT      |              |                                  |
| AT2G43740 | KNIMDN   | YKVEID   | VKIRDR  | REFGGFFGSFDN | YGLT     | SIGIY    | VCPI      |              |                                  |





```

1180      1190      1200      1210      1220      1230      1240      1250      1260
.....|.....|.....|.....|.....|.....|.....|.....|.....|.....|
AT3G59590 ---GNEWDDGI-FHNVKKINVGVDNFDIVFVKFHYSKY-NRIEAGAGHGNGATTHNPDDE---IMIAGGDYIEA-----VEGTYT
AT3G59610 ---GDEWDDGF-FDNVKEIIHTNSLGIIIVKFFYRNG-NRVVAGAAHGDESTETR-----GLMVPDDDYIEA-----VQGYT
AT1G19715 ---GQAWDDGV-FSGIKQIFVTRGNDAITSIQIEYDRNGQSVWSIKHGSDSNGVATHR---IKFEYPDESITC-----ISGYYG
AT3G59620 -----
AT1G73040 -----
AT5G46000 ---GNEWDDGI-HDDARMIT-----FKLYFNKEYITS-----VEGHYG
AT2G33070 EVVQ GKVVVYG-FNGCE-----VDDVHCYDPAQDKWTQVETFGKPCARSVFASAVVGKHLVFGGGEIAMDPKAHEGPGQLSGGTFA
AT3G16390 EVVQ GKWVIVYG-FNGCE-----VDDVHFYDPAEDKWTQVETFGVKPNERSVFASAAIGKHIVIFGGEIAMDPRAHVGPQLIDGTFA
AT3G16410 EVVQ GKVVVYG-FNGCE-----VDDVHYDVPQDKWTQVETFGVVRPERSVFASAAIGKHIVIFGGEIAMDPLAHVGPQLDGTFA
AT3G16400 EVVQ GKVVVYG-FNGCE-----VDDVHYDVPQDKWTQVETFGVVRPERSVFASAAIGKHIVIFGGEIAMDPLAHVGPQLDGTFA
AT1G52000 ---GETFDDGA-FDHVRKVVYGGD SGVAVKFDY EKDKKET--QEHGKMTLSG-TEE--FEVD-SDDYITS-----MEVYVD
AT5G39330 ---GVAWDDGV-YDGVKILVGGNDGVAFFVKFEYNKG-KDLVSGDDHGKMTLLG-TEE--FVLE-DGEYITA-----IDGYVD
AT2G39310 ---GVTWDDGV-YDGVKILVGGNDGVSFVKFEYSKG-KDLVPGDDHGKMTLLG-AEE--FVLE-DGEYLMN-----IDGYVD
AT3G16470 ---GVAWDDGV-HDSVKKIYVGGDSCVTYFKADYEKA-SKPVLSGDHGKMTLLG-AEE--FVLE-DGEYITA-----VSGYYD
AT5G38540 -----ELLG-MMV--FELD-PLERITS-----VEGYD
AT5G38550 ---GASWDDGGTFNSVRKIYIGLGNVGVFKFLYKKN-ARVVI GDDHGNKMTLLSLLLE--FLLD-PFEYIIS-----VEGYD
AT1G52120 ---SDIWDGDT-FEGVKKVSFYHNDGIVRCIEFDYVKD--GKIETRVQGGKRGTDFTKEEFTVDYPNEFLT-----VEGYR
AT1G52130 ---GNLWDDGS-FQGVKKVHIYDGYSVRCVRFYD DDD--CKVSEHGHGKIVAA-VQEGGFVLDYPNEVITS-----VEGIAT
AT1G52110 ---GASWDDGGNFEGVRKICIGTGEIGIVSVKFLYENDTHEIVVGDHGHGNKMLIK-HEE--FELDYPGEYITL-----VEGSYD
AT5G49850 ---GVPWDDGSNFERVKIYIGTCEVGIYVRFLENDIEEIVVGDHGHGNKMLLR-HEE--FDLDNACEYITS-----VEGSYD
AT5G49870 ---GAPWDDGSNFGVRKIYIGTGEVGIYSIKFLYENDVHEIVVGDHGHGNKMLLR-HEE--FDLDYPSEYITS-----VEGSYD
AT5G49860 ---GAPWDDGSNFEVVRKIYIGTGEIGIVSIKFLYENDIHEIIVGDHGHGNKMLLR-HEE--FDLDYPSEYITS-----VEGSYD
AT1G60130 ---GASWDDGG-FDCIRKIYIGHGEMGIAFVKFLYDKD-NKFVVGDDHGSKTLLG-VDE--FELEHPDEYILIS-----VEGSYD
AT1G60095 ---GASWDDGG-FDGIRNIYIGHNKMGIASFVKFLYDKD-SQIVVGDHGHGNKMLLR-VDE--FELEHPGEYILIS-----VEGSYD
AT1G60110 ---GASWDDGR-FDCIRKIYIGHSEMGIASFVKFLYDKD-NKVVVGDHGHGNKMLLR-VDE--FELEHPDEYILIS-----VEGSYD
AT3G16460 ---GTLWDDGA-FDGVKRVSVGQAQDGI GAVSFVYDKA-GQVVEGKEHGKPTLLG-FEE--FELDYPSEYITA-----VDGYD
AT1G52030 ---GASWDDGV-FDGVKILVGGNDGVAFFVTFEYNKG-SQAILGDRHGKQTLTG-TET--FELDYPSEYITS-----VEGYD
AT1G52040 ---GASWDDGV-FDGVKILVGGNDGVAFFVTFEYNKG-SQAILGDRHGKQTLTG-TET--FELDYPSEYITS-----VEGYD
AT3G21380 ---GNPWDDGP-HEGVRKVYIGQD SGVSVYKFFVYDKD-SKEVPGNDHGKRTLLA-PEE--FLLEYPNEYITS-----VELNYD
AT3G16430 ---GTAWDDGA-YVGVKKVYVGAQDGI SAVKFFVYDKS-PEEVTGEEHGKSTLLG-FEE--FVLDYPSEYIIA-----VEGYD
AT3G16420 ---GTVWDDGA-YVGVKKVYVGAQDGI SAVKFFVYDKS-PEEVTGEEHGKSTLLG-FEE--FVLDYPSEYITA-----VDGYD
AT3G16440 ---GTAWDDGA-FDGVKKVYIGQAQDGI SAVKFFVYDKG-AEDIVGDEHGNDTLLG-FEE--FQLDYPSEYITA-----VEGYD
AT3G16450 ---GTAWDDGA-YDGVKKVYVGGQDGI SAVKFEYNKG-AENIVGGEHGKPTLLG-FEE--FEIDYPSEYITA-----VEGYD
AT1G52100 ---GDSWDDGA-FKNVKKIYVGGDVGIAAVKFEYETYTSEVILAEERHGKPTLLG-YED-----
AT5G35950 ---GDSWDDGA-FLNVKKVICIGQGFIVSVKFEYENDASEVVVGDHGHKATLLG-YEE--FELDYPSEYITS-----VEACQD
AT5G35940 ---GDSWDDGA-FLNVKKVYIGQGSNGIVAVKFEYENDASEVVVGDHGHKPTLLG-YEV--FELDYPNEYITS-----LEGCHD
AT1G58160 -----
AT1G57570 ---GDSWDDGV-FEGVRKLYVGGKNCVAFKLVVYDSN-TQVVI GEDHGNKTLFE-VKE--YELEYPSEYITA-----VDGCYN
AT1G61230 ---GAFWDDGV-YDGVKKIYVGGQENGI APLKFFVYDKD-TRMVI GDDHGNKTPLE-VKE--LDLEYPGEYVTA-----VEGCYN
AT1G52050 -----ISS-----
AT1G52060 -----
AT1G52070 -----
AT2G25980 ---GESWDDGA-FDGVRKIYVGGQENGI ASVKFFVYDKN-NQLVLGEEHGKHTLLG-YEE--FELDYPSEYITA-----VEGYD
AT5G28520 ---GDPWDDGI-FNGVREIHLEDGEG--IALKFFVYDKD-VQVTELKVHGEPSGIG-FNE--FKLDYPSEYITT-----VEGFWD
AT1G33790 ---GDPWSDGV-FNGVRNIYVGGQENGVSAVKFFVYDKD-SQVAEGNDHGKPTLLG-YEE--FKLEYPSEYITT-----VEGCFD
AT1G05760 -----IVKPTGTRNAEET-----
AT1G05770 -----
AT2G43730 ---NQAWDP--LYAFAHNQIPTIADGIPVMHIRYKPKLKDRIF-----SKLDFKRAMLCL-----IKVFLD
AT2G43740 -----TRINDVALRTRYKVTDDYDDQSTFVQSSGPLTTINHRK--LEYQMPHEVSDV-----KPIVHN

```

```

1270      1280      1290      1300      1310      1320      1330      1340      1350
.....|.....|.....|.....|.....|.....|.....|.....|.....|.....|
AT3G59590 E-----SHITSITFRMRKQDM-----MPQYGRING---TFPSLRGERSKAIGFYGRSSGVHLTALGVHFSPPPLY
AT3G59610 E-----SHITSMARLHKGNR-----SLRFGFFEG---MSFVLGGARGSKIIIFYGRSSDLYLTAFGVHFSPLP---
AT1G19715 PLNN---SDR-----YNVVKLSFYTSRGR-----YGPYGEETG---TFFTSTT-TQCKVLGFHGRSSFH-LDAIGVHMQHHLGNN
AT3G59620 -----CVRKIEFITNK-RT-----FDFG-----GFN-----
AT1G73040 -----KMINKLRKKIHW-----LTRIVA-----
AT5G46000 KRLAAPNASASAMSSFTGYMTMLKFMNTNR-TTYQVLSHSPEYTYEG---TSFKLEE-KDNKIVGFYGKTEVS-LNQIGVYVVKPIANA-
AT2G33070 LD-----TET-----LKWKLDKLGEEE-ET-----PSIRGWSAS---TTGTIDGKKGLVMFVGKKAQTNDR-FGDLFFYGVDSA---
AT3G16390 LDTE-----TLQWERLDKFEFEG---T-----PSSRGWTAS---TTGTIDGKKGLVMHGGKAPTNDR-FDDLFFYGIDSV---
AT3G16410 LDTE-----TLQWERLDKFGGEE-ET-----PSSRGWTAS---TTATIGGKKGLVMHGGKAPTNDR-FDDLFFYGIDSA---
AT3G16400 LDTE-----TLQWERLDKFGGEE-ET-----PSSRGWTAS---TTATIDGKKGLVMHGGKAPTNDR-FDDLFFYGIDSA---
AT1G52000 KVYG---YKS-----EIVIALTFKTFKGET-----SPRFGIETE---NKYEVKDGKGGKLAGFHKASDV-LYAIGAYFIPAAN--
AT3G39330 KIFG---VET-----PMIICLQFKTNK-RE-----SPFGMDSG---EKFSLGE-KGHKIVGFHGQASDV-VHSIGVIVVPIGNTK
AT2G39310 KIFG---VEE-----PIIVCLQFKTNK-RE-----SMPFGMDSG---KKFSLGE-EGHKIVGFHGQASDV-VHSIGVIVPITTE
AT3G16470 KIFS---VDA-----PAIVSLKFKTNK-RT-----SIPYGLEGG---TEFVLEK-KDNKIVGFYGOAGEY-LYKLGVMVAPIAK--
AT5G38540 DKIG-----GITMLRFKTNK-KD-----SPYFGFGLT---PSFVLHK-DNHQIVGFHGKSSNM-LHQIGVHVLVPLNGFKF
AT5G38550 DTSG-----GITMLRFKTNL-QK-----SPYFGFGLT---SNFLLHK-DNHQIVGFHGKSSNM-LHQIGVHVLVPLDPP
AT1G52120 DNPQ-----GTLITSLTFKTSNNRT-----SPILGKASN---KTFLLS-KGCALVGFHGASSDFFLYALGAYSFPMTSLA
AT1G52130 VVNTGLSFSTG-----NVMIKSLTFKTSKGR-----SPFGNVEFGNYLSEFKLES-QCQIVGFHGGRSSYNSHGLGAYFFMPSSH
AT1G52110 IVPQ---SEE-----TEVIIMLMFTTNM-RA-----SPCYGLDDN---PSFVLQK-RGHKIVGFHGKSSKM-LHQIGVHVLVPIHP-
AT5G49850 VIPG---SED-----VEVIIMLMFTTNK-RT-----SPCYGLDDD---PTFVLEK-AGHRIIGFHGKSSNM-LHKLGIVHVLVPIHP-
AT5G49870 VVPQ---SEE-----YEVIIMLMFTTNK-RT-----SPCYGLDDD---PIFVLEK-EGHKIVGFHGKSSNM-LHKLGIVHVLVPIHP-
AT5G49860 VVPQ---SEE-----DEVIMLMFTTNM-RT-----SPCYGLDDD---PSFVLEK-EGHKIVGFHGKSSNM-LHKLGIVHVLVPIHP-
AT1G60130 VVDG---SES-----EVIMLMRFKTNM-RT-----SQVFGDFTT---SSFILEK-ECHKIVGFHGKIGKM-LHQIGVHVLVPIHP-
AT1G60095 VVDG---SES-----EVIRMLRFKTNL-RT-----SQVFGDFTT---SNFLLHK-DNHQIVGFHGKSSNM-LHQIGVHVLVPIHP-
AT1G60110 VVDG---SES-----EVIRMLRFKTNM-RT-----SQVFGDFTT---SNFLLHK-DNHQIVGFHGKSSNM-LHQIGVHVLVPIHP-
AT3G16460 AIFG---NEP-----IVNMLRFKTNK-RV-----SIPFGIGAG---TAFEFK-DGQKIVGFHGRAGDL-LHKFGVHVAPIPK-
AT1G52030 KIFG---VEA-----EVVTSLTFKTNK-RT-----SQVFGDFTT---EHFELNE-DGYKIVGFHGKAGDL-VHQIGVHAVPIFTNY
AT1G52040 KIFG---VEA-----EVVTSLTFKTNL-RT-----SQVFGDFTT---EHFELKE-DGYKIVGFHGKAGDL-VHQIGVHAVPIFTNY
AT3G21380 KIFG---TEG-----EIIITMLRFKTNK-RT-----SPPFGLEGA---KSVLLKE-DGHKIVGFHGKAGADIIHQVGVHVKPISK-
AT3G16430 KIFG---SDG-----SVITMLRFKTNK-QT-----SPPFGLEAG---TAFELKE-EGHKIVGFHGRADAL-LHKIGVHVVRVPSN-
AT3G16420 KIFG---SDG-----SVITMLRFKTNK-QT-----SPPFGLEAG---TVFELKE-EGHKIVGFHGRADVL-LHKIGVHVVRPLSN-
AT3G16440 KIFG---FET-----EVINMLRFKTNK-KT-----SPPFGLEAG---TAFELKE-EGCKIVGFHGKVSAN-LHQIGVHILVPTN-
AT3G16450 KIFG---SDG-----LIITMLRFKTNK-QT-----SAPFGLEAG---TAFELKE-EGHKIVGFHGKASEL-LHQIGVHVMPITN-
AT1G52100 -----LNWTIR-----VSTLQLWVVTIK-
AT5G35950 KVMG---AET-----GVLITMLRFKTNL-RI-----SPSFGKAG---FNFVLEK-EGHKINGFHGKSSSM-LHQIGVHVPIHP-
AT5G35940 KVMG---AET-----GVITMLRFKTNK-RT-----SPPFGLEAG---VNFVLEK-ESHKIVGFHGKSSSM-LHQIGVHVVPITN-
AT1G58160 -----SPAK-----
AT1G57570 KVNG---TEV-----EVITMLRIQTNK-RT-----SIPVGCESN---SSFVLEK-EGYKIVGFHGKASNM-INQLGVHVVPLTE-
AT1G61230 KGIE---GDV-----ESITMLKFKTNK-RT-----SISFGFESS---SSFVLEK-EGFKIVGFHGKASNM-INQLGVHVVPIHP-
AT1G52050 -----
AT1G52060 -----PS-----
AT1G52070 -----
AT2G25980 KVFG---SES-----SVIVMLKFKTNK-RT-----SPYGMDSG---VSFILK-EGHKVGFHGKASPE-LYQIGVIVAPIPK-
AT5G28520 KTSQ---NER-----GVITRLRFKTNK-QT-----FRPVGLEST---TSFSLGK-EGYKIVGFHGNSSTDKLHQLGVVVPITRE-
AT1G33790 KIFG---SGG-----GVITMLKFKTNK-RT-----SPPFGLETT---SNFVLEK-EGYKIVGFHGTSSEH-LHQIGVHVMPITN-
AT1G05760 -----TVLPKIDTGNAE-ET-----ESKIVLG-
AT1G05770 -----ESNIVLG-
AT2G43730 -----
AT2G43740 PNFE-----DKISLYQSSDRLARS-----TNTRTLE-----YQIPEFLDNPIGRKSKLKYGIFSKLARLFRNLDD-

```



```
.....|.....|.....|..
AT3G59590 SFPNHSPVFN-----
AT3G59610 -----
AT1G19715 KSYYSRASCFKLF-----
AT3G59620 -----
AT1G73040 -----
AT5G46000 -----
AT2G33070 -----
AT3G16390 -----
AT3G16410 -----
AT3G16400 -----
AT1G52000 -----
AT2G39330 -----
AT2G39310 -----
AT3G16470 -----
AT5G38540 VS-----
AT5G38550 I-----
AT1G52120 EAGRGAIHTSW-----
AT1G52130 DGKALEEQGGDGLGGV
AT1G52110 -----
AT5G49850 -----
AT5G49870 -----
AT5G49860 -----
AT1G60130 -----
AT1G60095 -----
AT1G60110 -----
AT3G16460 -----
AT1G52030 RCVF-----
AT1G52040 RVAI-----
AT3G21380 -----
AT3G16430 -----
AT3G16420 -----
AT3G16440 -----
AT3G16450 -----
AT1G52100 -----
AT5G35950 -----
AT5G35940 -----
AT1G58160 -----
AT1G57570 -----
AT1G61230 -----
AT1G52050 -----
AT1G52060 -----
AT1G52070 -----
AT2G25980 -----
AT5G28520 -----
AT1G33790 -----
AT1G05760 -----
AT1G05770 -----
AT2G43730 -----
AT2G43740 -----
```
